# Supplementary material for: Cannabimimetic N-Stearoylethanolamine as “Double-Edged Sword” in Anticancer Chemotherapy: Proapoptotic Effect on Tumor Cells and Suppression of Tumor Growth versus Its Bio-Protective Actions in Complex with Polymeric Carrier on General Toxicity of Doxorubicin In Vivo
Source: MDPI journal article supplement (doi:10.3390/pharmaceutics15030835), 2023-03-03
Supplement: s1 [file s1]

A

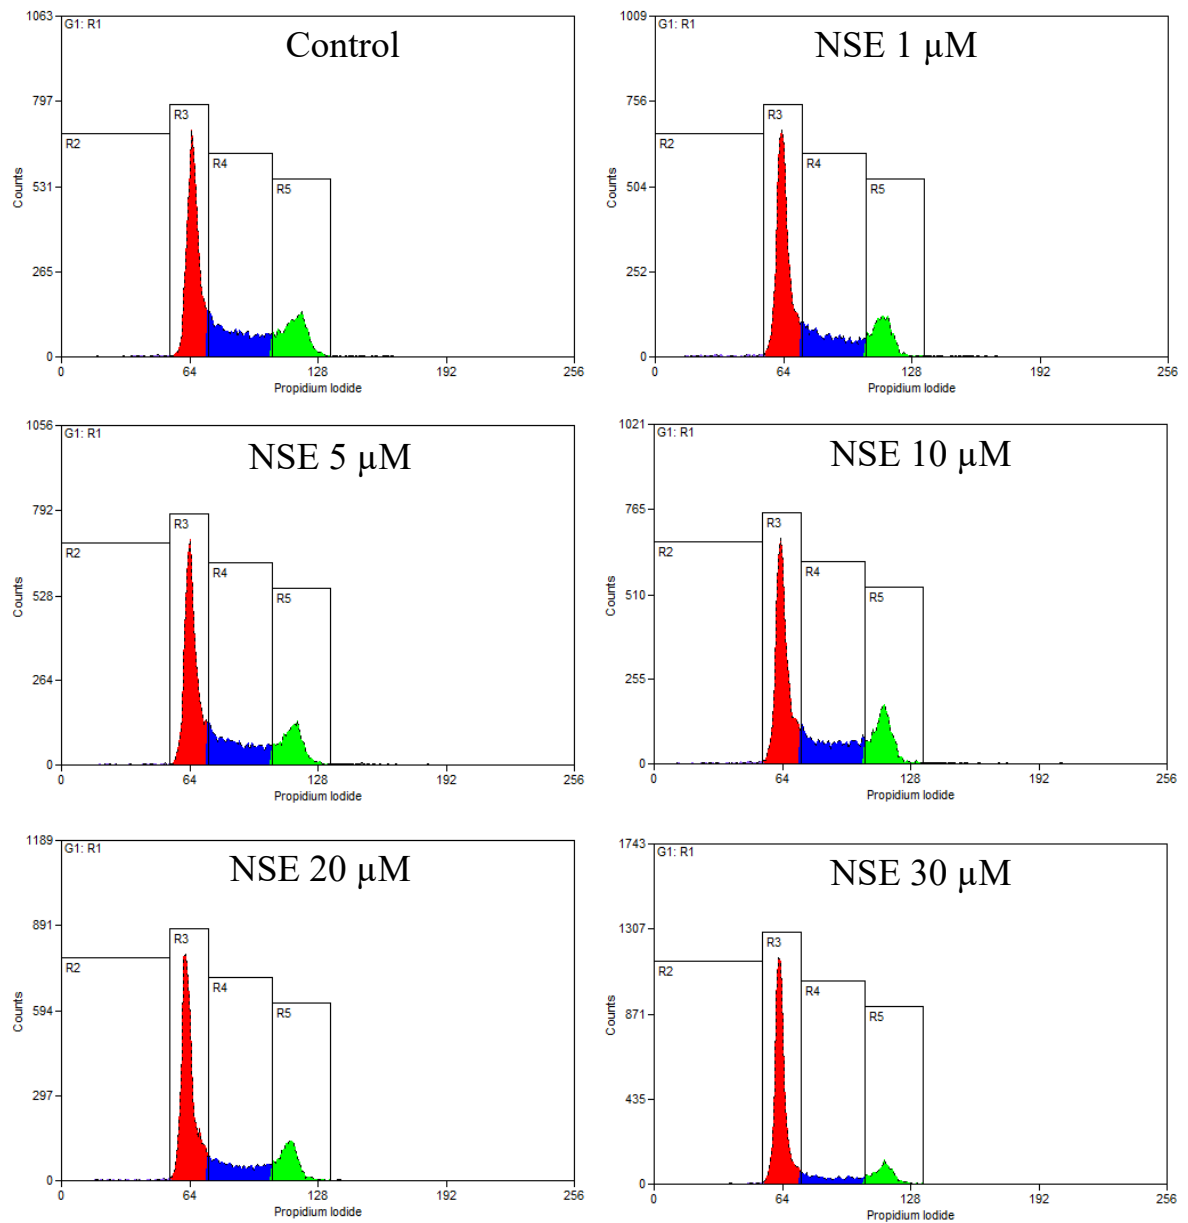

B

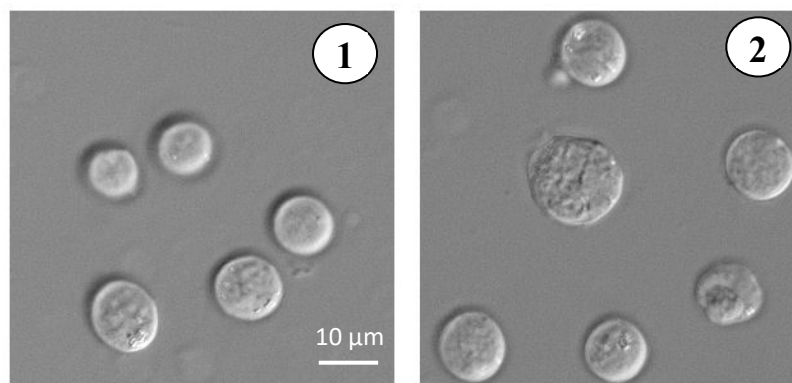

**Figure S1.** Assessment of cytostatic properties of NSE *in vitro*. (A) Impact of NSE on cell cycle distribution of murine leukemia cells of L1210 line (24 h incubation, PI staining). (B) An increase in diameter of human T-leukemia Jurkat cells after their treatment for 24 h with N-stearoyl ethanolamine (30  $\mu$ M). Light microscopy, x40.

Notes: R2 – pre-G1 cells, R3 – G1, R4 – S, R5 – G2

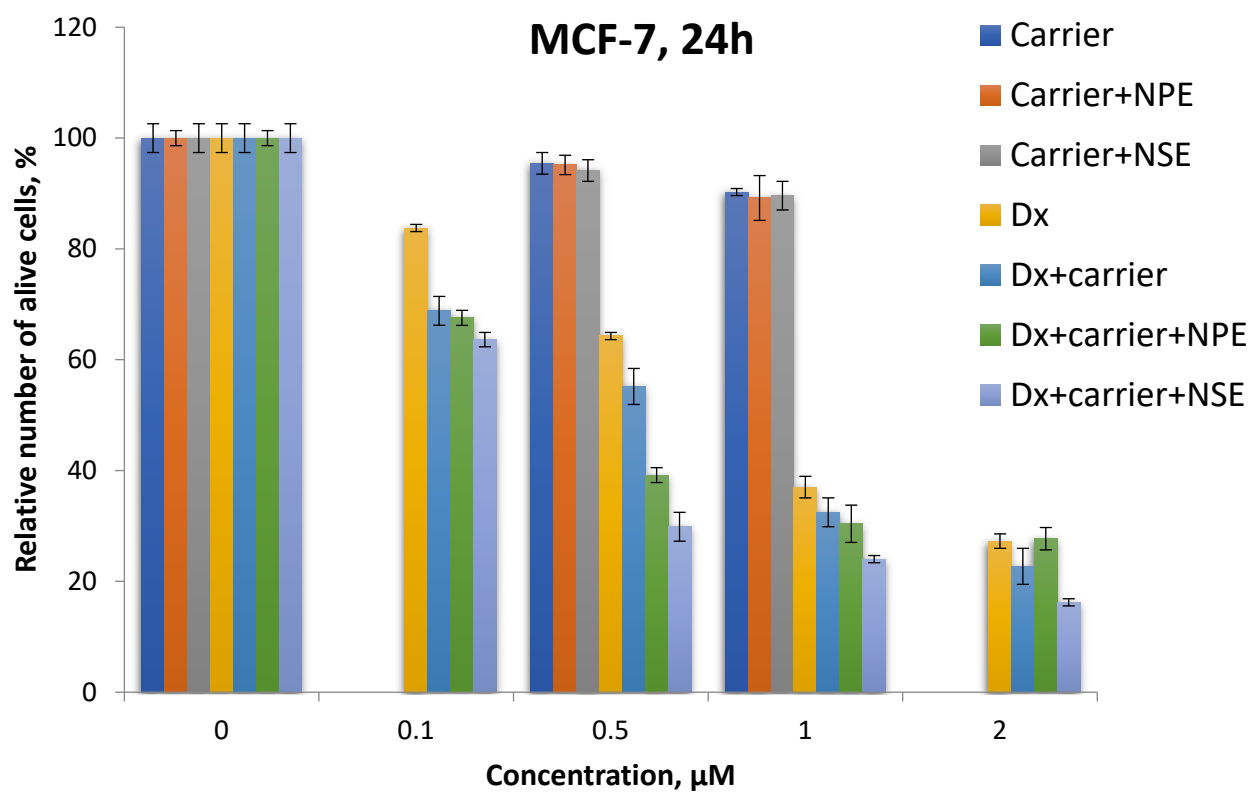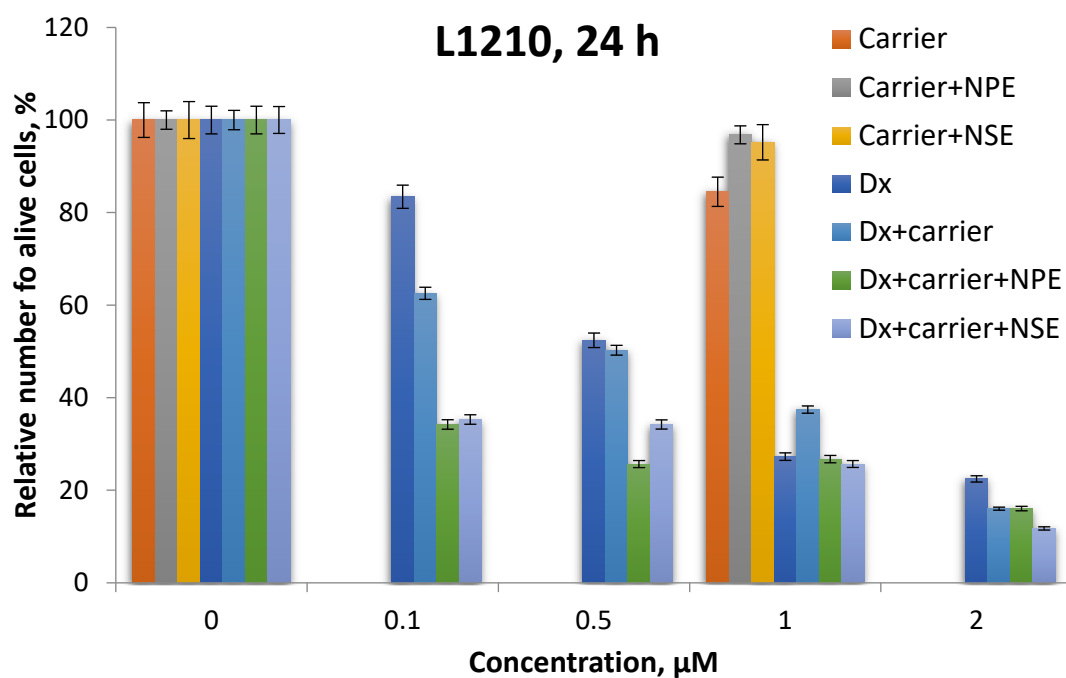

**Figure S2.** Viability of the indicated cell lines after treatment with Dx, Dx-PC, Dx-PC-NPE and Dx-PC-NSE complexes for 24 h, analyzed by trypan blue exclusion.

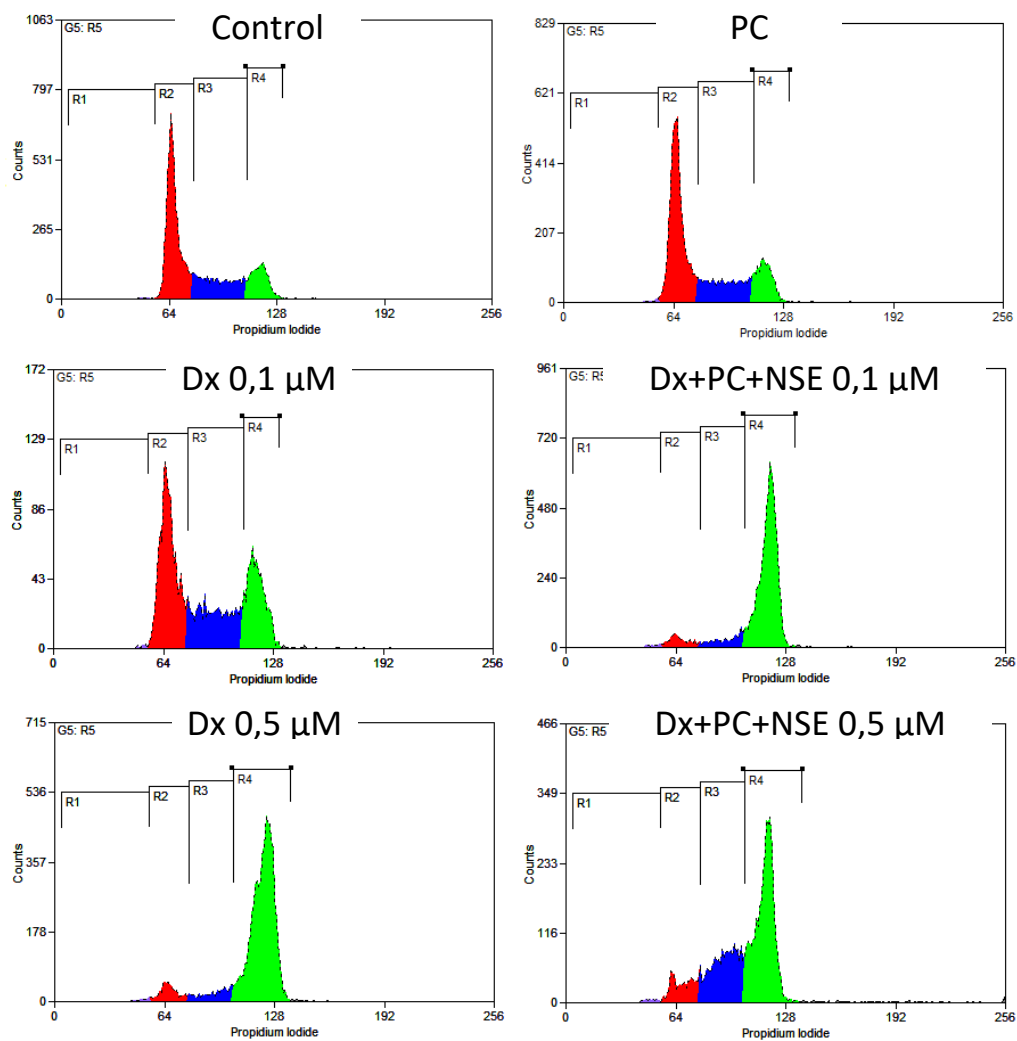

**Figure S3.** Changes in cell cycle progression in Jurkat cells under treatment with various concentrations of Dx and Dx-PC-NSE, PI staining (24 h incubation).

Notes: R2 – pre-G1 cells, R3 – G1, R4 – S, R5 – G2

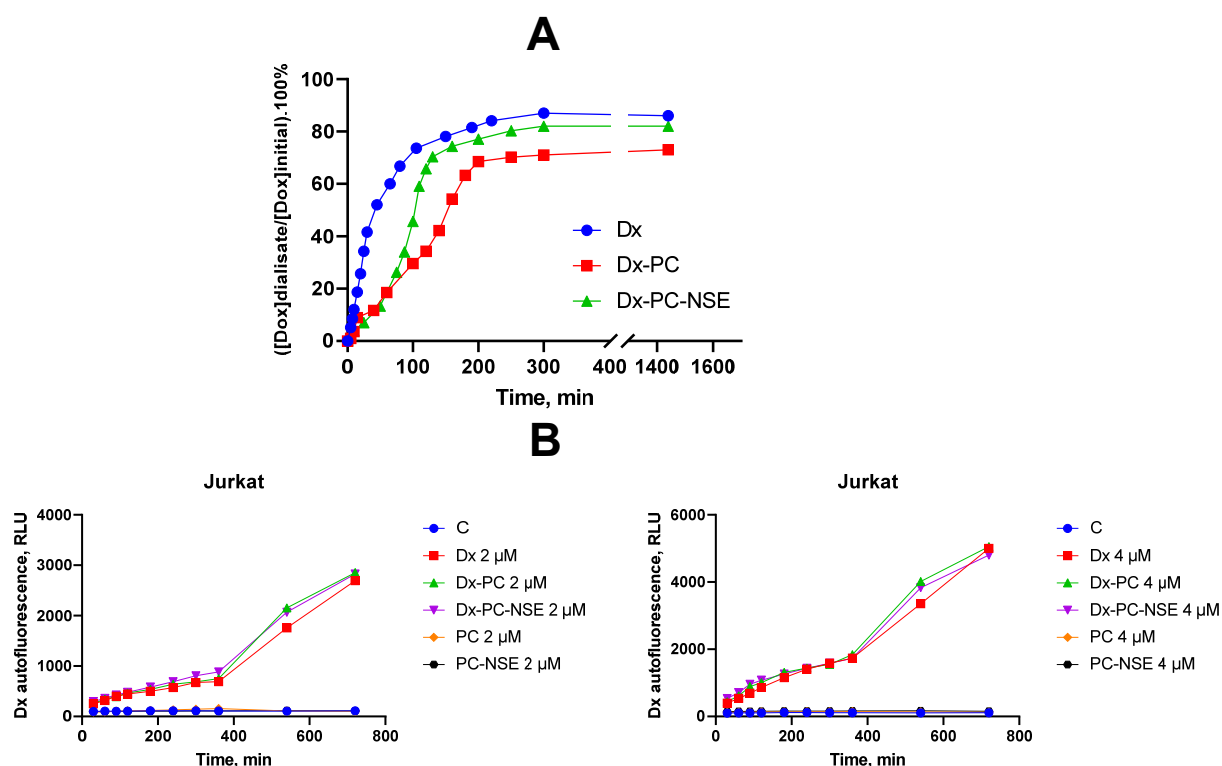

**Figure S4.** Long-term quantitative analysis of Dx release from its complex with polymeric carrier and its entry into Jurkat T-cells. (A) Time-dependent (0 min – 1440 min) dynamics of a release of free Dx (1) and of Dx immobilized in the micellar complexes Dx-PC (2) and Dx-PC-NSE (3) through the dialysis membrane in aqueous solution (initial concentrations of components loaded into the dialysis tubings were: [NSE] = 0.3 mg/mL; [PC] = 10 mg/mL; [Dx] = 0.3 mg/mL). (B) FACS analysis of time- (30 min-720 min) and concentration-dependent dynamics of Dx, Dx-PC and Dx-PC-NSE entry into Jurkat T-cells *in vitro*.

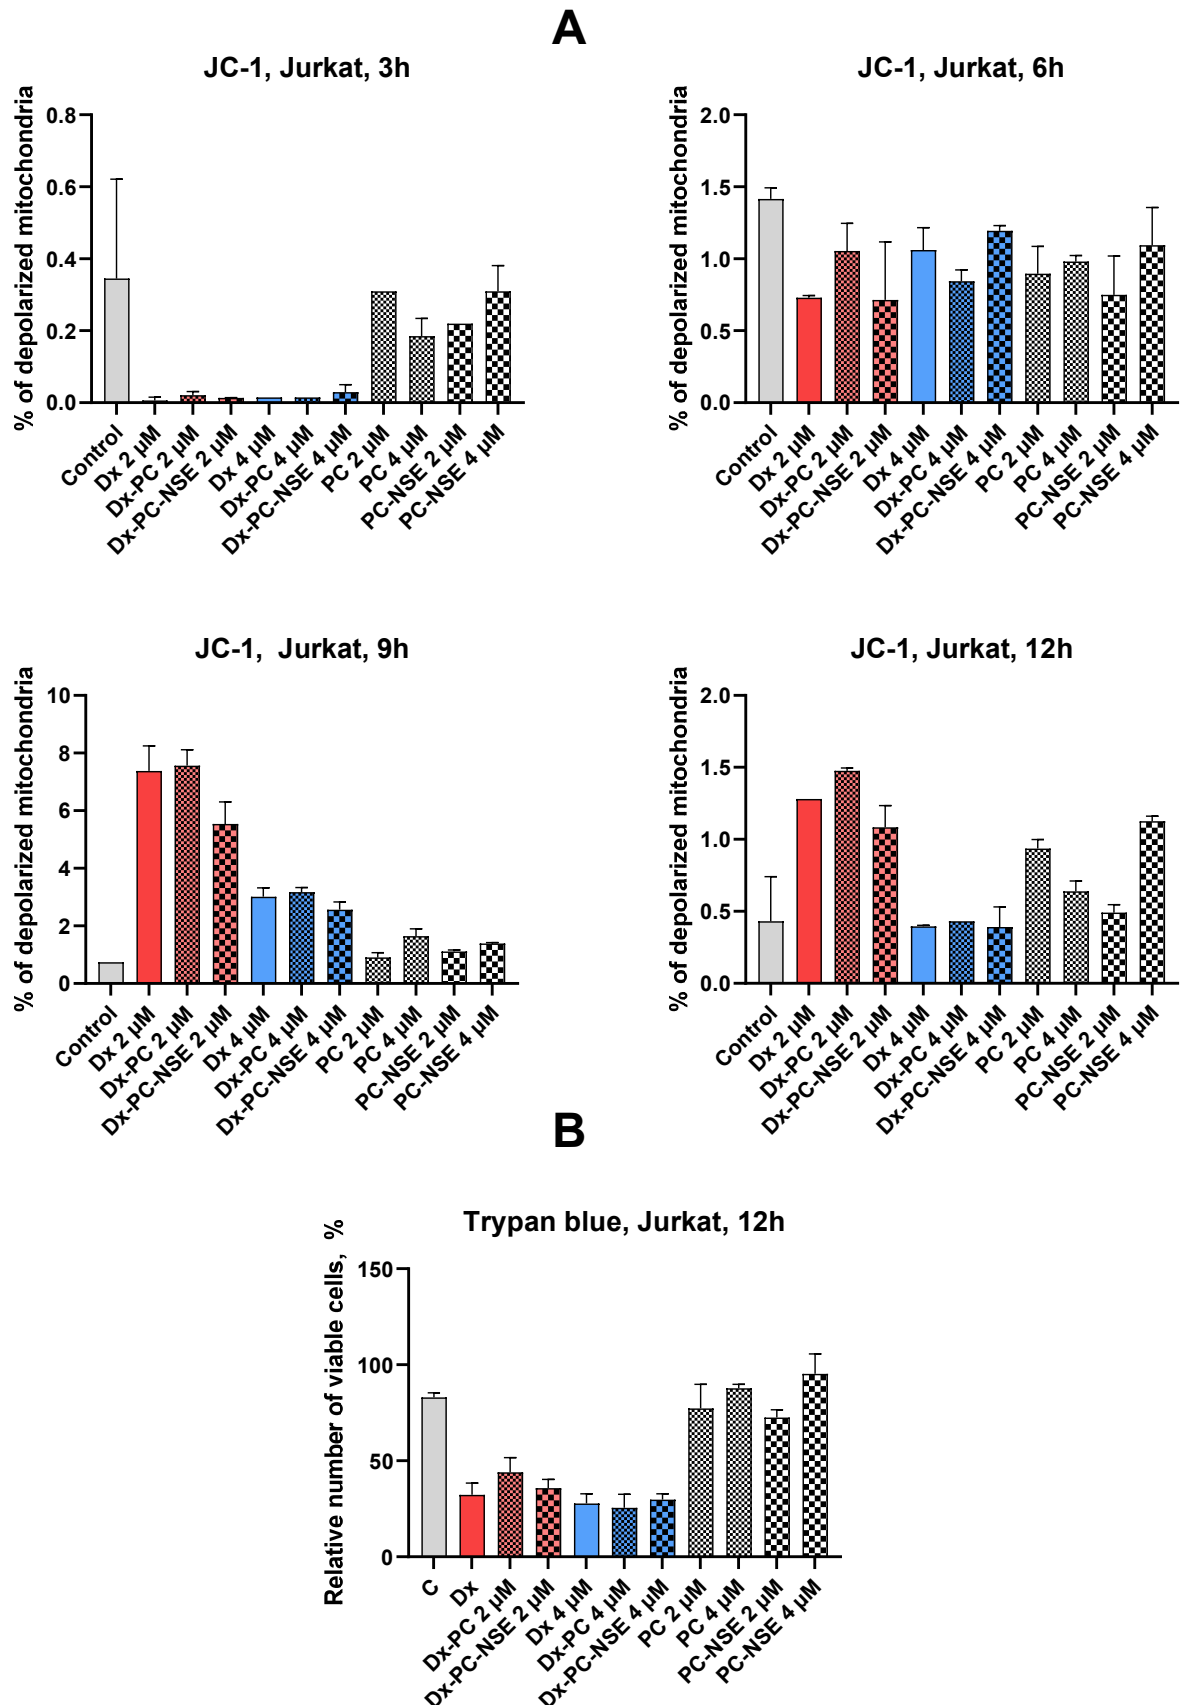

**Figure S5.** Time-dependent impact of Dx, Dx-PC and Dx-PC-NSE on depolarization of mitochondria in Jurkat cells and their survival. (A) Flow cytometry, JC-1 staining. (B) Trypan blue exclusion assay. One of three experiments delivering comparable data is shown.

A

## Survival of animals with NK/Ly lymphoma

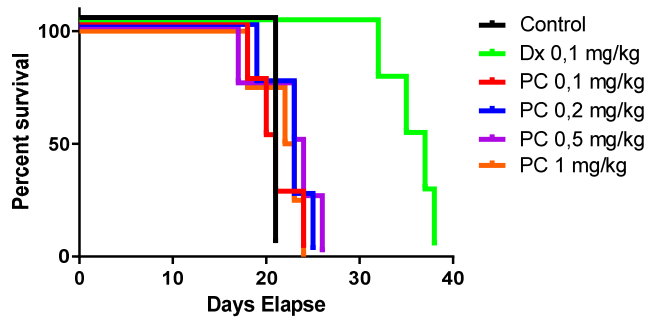

B

## Survival of mice with L1210 leukemia

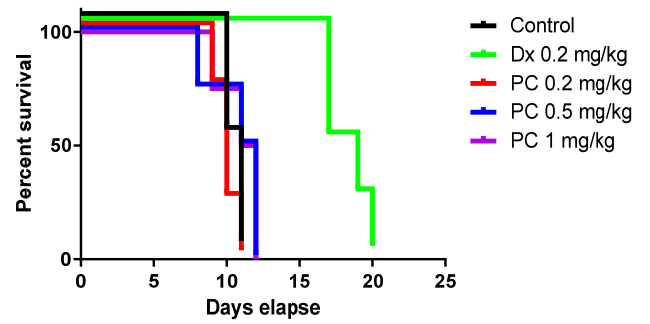

## Survival of animals with NK/Ly lymphoma

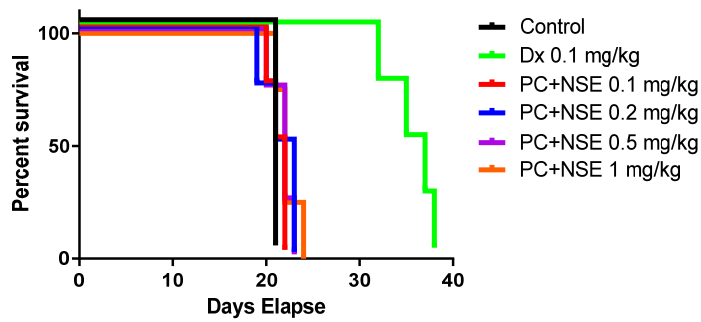

## Survival of mice with L1210 leukemia

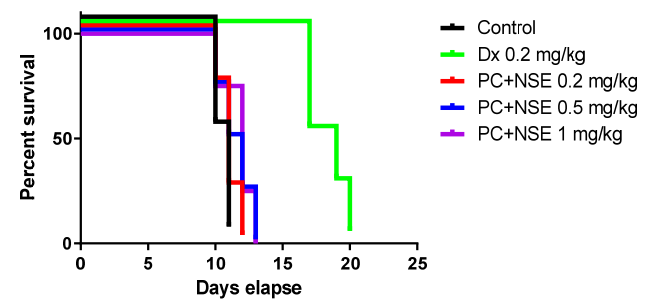

**Figure S6.** Comparison of therapeutic activity of PC and PC-NSE in various doses (equivalent to those doses of PC and PC-NSE, used to delivery of 0.1 mg/kg-1 mg/kg Dx) towards animals bearing NK/Ly lymphoma (A) and L1210 leukemia (B), respectively.

**Table S1.** Results of densitometric analysis of Western-blot analysis of time-dependent action of Dx, Dx-PC and Dx-PC-NSE towards human T-leukemia cells of Jurkat line.

| Protein       | Lanes |      |      |      |       |       |      |      |      |       |      |      |      |       |
|---------------|-------|------|------|------|-------|-------|------|------|------|-------|------|------|------|-------|
|               | 1     | 2    | 3    | 4    | 5     | 6     | 7    | 8    | 9    | 10    | 11   | 12   | 13   | 14    |
| cl. caspase-3 | 1,00  | 1,31 | 1,57 | 4,10 | 12,73 | 15,46 | 2,18 | 3,27 | 7,28 | 13,39 | 3,08 | 3,07 | 8,12 | 11,76 |
| cl. caspase-7 | 1,00  | 1,51 | 1,63 | 2,79 | 10,50 | 14,14 | 2,21 | 4,26 | 6,86 | 12,01 | 1,96 | 1,85 | 4,71 | 6,74  |
| DFF45         | 1,00  | 1,67 | 1,79 | 1,32 | 1,18  | 0,51  | 2,48 | 2,50 | 1,30 | 0,56  | 1,19 | 0,86 | 0,96 | 0,24  |
| PARP-1        | 1,00  | 1,12 | 1,75 | 1,25 | 1,29  | 0,21  | 3,02 | 3,35 | 0,60 | 0,31  | 2,32 | 1,71 | 1,12 | 0,01  |
| cl. PARP-1    | 0,00  | 0,00 | 0,01 | 0,13 | 1,88  | 2,55  | 0,23 | 0,36 | 1,45 | 3,49  | 0,12 | 0,20 | 1,04 | 1,71  |
| procaspase-6  | 1,00  | 1,85 | 1,61 | 1,08 | 1,57  | 1,16  | 1,70 | 1,82 | 1,16 | 1,12  | 1,14 | 0,84 | 0,92 | 0,65  |
| procaspase-2  | 1,00  | 1,46 | 1,84 | 1,60 | 0,64  | 0,49  | 2,16 | 3,24 | 1,00 | 0,47  | 1,57 | 1,16 | 0,75 | 0,11  |
| procaspase-8  | 1,00  | 1,45 | 1,80 | 1,27 | 1,31  | 0,52  | 1,65 | 2,21 | 0,78 | 0,73  | 1,18 | 0,88 | 0,73 | 0,13  |
| cl. caspase-8 | 0,05  | 0,04 | 0,04 | 0,07 | 1,00  | 0,39  | 0,04 | 0,14 | 0,24 | 0,52  | 0,05 | 0,06 | 0,35 | 0,20  |
| procaspase-9  | 1,00  | 1,53 | 1,57 | 1,35 | 1,47  | 0,96  | 2,03 | 2,41 | 1,49 | 1,04  | 1,53 | 1,13 | 1,06 | 0,43  |
| cl.caspase-9  | 0,14  | 0,02 | 0,14 | 1,00 | 0,89  | 0,22  | 0,01 | 0,49 | 0,85 | 0,27  | 0,03 | 0,24 | 0,41 | 0,22  |
| procaspase-10 | 1,00  | 2,34 | 2,13 | 2,24 | 2,13  | 1,19  | 2,56 | 4,48 | 2,10 | 1,05  | 1,77 | 0,59 | 1,18 | 0,27  |
| FADD          | 1,00  | 1,56 | 2,23 | 1,84 | 1,83  | 1,21  | 1,74 | 2,74 | 0,78 | 1,04  | 0,78 | 0,64 | 1,02 | 0,52  |
| AIF           | 1,00  | 1,36 | 1,19 | 0,92 | 1,63  | 1,96  | 1,37 | 1,43 | 1,17 | 1,60  | 0,95 | 0,72 | 0,85 | 1,00  |
| Bcl-2         | 1,00  | 1,26 | 0,72 | 0,70 | 1,69  | 2,14  | 0,65 | 2,14 | 0,76 | 1,73  | 1,29 | 0,66 | 0,50 | 0,41  |
| Bid           | 1,00  | 1,81 | 2,05 | 1,90 | 2,19  | 1,21  | 2,11 | 3,13 | 1,29 | 0,50  | 1,31 | 0,81 | 1,14 | 0,30  |

Notes:

- 1 – control
- 2 – PC+NSE, 2  $\mu$ M, 24 h
- 3 – Dx, 2  $\mu$ M, 3 h
- 4 – Dx, 2  $\mu$ M, 6 h
- 5 – Dx, 2  $\mu$ M, 9 h
- 6 – Dx, 2  $\mu$ M, 12 h
- 7 – Dx+PC, 2  $\mu$ M, 3 h
- 8 – Dx+PC, 2  $\mu$ M, 6 h
- 9 – Dx+PC, 2  $\mu$ M, 9 h
- 10 – Dx+PC, 2  $\mu$ M, 12 h
- 11 – Dx+PC+NSE, 2  $\mu$ M, 3 h
- 12 – Dx+PC+NSE, 2  $\mu$ M, 6 h
- 13 – Dx+PC+NSE, 2  $\mu$ M, 9 h
- 14 – Dx+PC+NSE, 2  $\mu$ M, 12 h
